# Supplementary material for: Pancancer analysis of DCTPP1 and the impact of the combined knockdown of DCTPP1 with docetaxel on breast cancer
Source: Research Square preprint supplement (doi:10.21203/rs.3.rs-8065730/v1), 2025-12-23
Supplement: Supplementary file 2 [file 22deeb51023c2d2f0eac5bd1.docx]

Supplementary table 1 List of primer sequences

| **Gene** | **Primer** | **Sequence (5'-3')** | **PCR Products** |
| --- | --- | --- | --- |
| b-actin | Forward | CACGATGGAGGGGCCGGACTCATC | 240bp |
| Reverse | TAAAGACCTCTATGCCAACACAGT |
| Homo DCTPP1 | Forward | CCCCCACTTCCCCAACCA | 100bp |
| Reverse | GACATCCGCCGCCTCCAT |
| Homo TGF-β | Forward | ATGAGAAGCAGGAAAGGC | 440bp |
| Reverse | GAAACCCACAACGAAATC |
| Homo E-cadherin | Forward | CGTAGCAGTGACGAATGTGG | 175bp |
| Reverse | CTGGGCAGTGTAGGATGTGA |
