# Supplementary material for: Pancancer analysis of DCTPP1 and the impact of the combined knockdown of DCTPP1 with docetaxel on breast cancer
Source: Research Square preprint supplement (doi:10.21203/rs.3.rs-8065730/v1), 2025-12-23
Supplement: Supplementary file 3 [file 3012bc0c72600203ad045116.docx]

Supplementary table 2 List of WB Antibody Information

| Name | Manufacturer Item | No. |
| --- | --- | --- |
| Mouse monoclonal antibody β-actin（42KD) | Wuhan BMD Bioengineering Co. | BM0627 |
| Rabbit Polyanti DCTPP1（19KD) | novus | NBP3-00337 |
| Rabbit Monoclonal Anti TGF beta 1（44/13KD) | abcam | ab215715 |
| Rabbit Polyanti E-cadherin （120KD) | affinity | AF0131 |
| HRP-labeled sheep anti-rabbit secondary antibody | Wuhan BMD Bioengineering Co. | BA1054 |
| HRP-labeled sheep anti-mouse secondary antibody | Wuhan BMD Bioengineering Co. | BA1051 |
