# Supplementary material for: Pancancer analysis of DCTPP1 and the impact of the combined knockdown of DCTPP1 with docetaxel on breast cancer
Source: Research Square preprint supplement (doi:10.21203/rs.3.rs-8065730/v1), 2025-12-23
Supplement: Supplementary file 4 [file 49cb09ab2980e02465f1e4fb.docx]

Supplementary table 3 List of IHC Antibody Information

| Indicator name | Antibody species | Brand Item | No. | Dilution ratio |
| --- | --- | --- | --- | --- |
| DCTPP1 | Rabbit | novus | NBP3-00337 | 1：20000 |
| TGF-β | Rabbit | abcam | ab215715 | 1：500 |
| E-cadherin | Rabbit | affinity | AF0131 | 1：100 |
